# Supplementary material for: Effect of Post-Thermal Annealing on the Performance and Charge Photogeneration Dynamics of PffBT4T-2OD/PC71BM Solar Cells
Source: PubMed Central journal article supplement (PMC6473355; doi:10.3390/polym11030408), 2019-03-02
Supplement: polymers-11-00408-s001.pdf [file polymers-11-00408-s001.pdf]

## Supplementary materials

### Effect of Post-Thermal Annealing on the Performance and Charge Photogeneration Dynamics of PffBT4T-2OD/PC<sub>71</sub>BM Solar Cells

Wei Zhang<sup>1,\*</sup>, Rong Hu<sup>2,\*</sup>, Xiaokang Zeng<sup>2</sup>, Xiaojun Su<sup>3</sup>, Zhifeng Chen<sup>1</sup>, Xianshao Zou<sup>3</sup>, Jun Peng<sup>1</sup>, Chengyun Zhang<sup>1</sup> and Arkady Yartsev<sup>3</sup>

<sup>1</sup> School of Physics and Electronic Engineering, Guangzhou University, Guangzhou 510006, China

<sup>2</sup> Research Institute for New Materials Technology, Chongqing University of Arts and Science Chongqing 402160, China

<sup>3</sup> NanoLund and Division of Chemical Physics, Lund University, Lund 22100, Sweden

\*Correspondence: [wzhang@gzhu.edu.cn](mailto:wzhang@gzhu.edu.cn); [hurong\\_82@cqwu.edu.cn](mailto:hurong_82@cqwu.edu.cn)

#### S1 Current density-voltage ( $J$ - $V$ ) curves of PffBT4T-2OD and PffBT4T-2OD:PC<sub>71</sub>BM devices

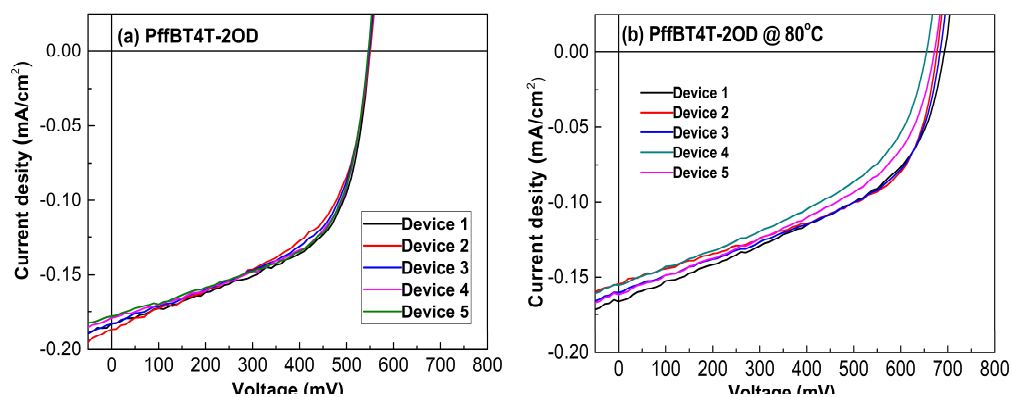

Figure S1.  $J$ - $V$  curves of PffBT4T-2OD devices fabricated at indicated post thermal-annealing temperatures.

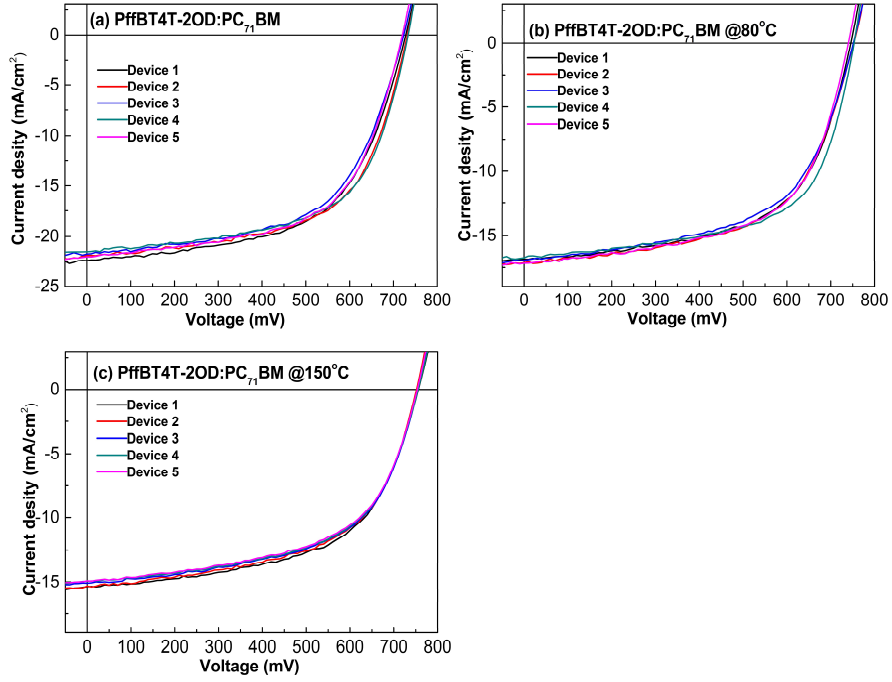

Figure S2.  $J$ - $V$  curves of PffBT4T-2OD:PC<sub>71</sub>BM devices fabricated at indicated post thermal-annealing temperatures.

## S2 Fitting parameters of TRPL kinetics traces

Table ST1. Fitting parameters of TRPL kinetics traces in Figures 4.

| Sample                                          | Fitting parameters |               |       |               |                                 |
|-------------------------------------------------|--------------------|---------------|-------|---------------|---------------------------------|
|                                                 | $A_1$              | $\tau_1$ (ps) | $A_2$ | $\tau_2$ (ps) | $\bar{\tau}$ (ps) <sup>a)</sup> |
| Net PffBT4T-2OD                                 | 1                  | 305           |       |               | 305                             |
| Unannealed PffBT4T-2OD/PC <sub>71</sub> BM      | 0.34               | 8             | 0.66  | 43            | 31                              |
| 80 °C annealed PffBT4T-2OD/PC <sub>71</sub> BM  | 0.31               | 9             | 0.69  | 83            | 60                              |
| 150 °C annealed PffBT4T-2OD/PC <sub>71</sub> BM | 0.27               | 9             | 0.73  | 96            | 72                              |

a)  $\bar{\tau} = \frac{A_1\tau_1 + A_2\tau_2}{A_1 + A_2}$

## S3 TA kinetics under varies excitation fluencies

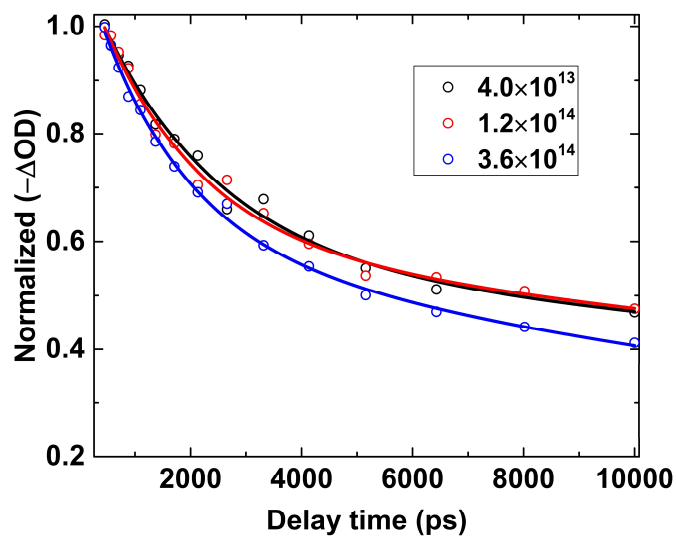

Figure S3. Normalized TA kinetics of 80 °C annealed PffBT4T-2OD:PC<sub>71</sub>BM film after photoexcitation at 650 nm and probe at 700nm. The excitation fluences are  $4.0 \times 10^{13}$ ,  $1.2 \times 10^{14}$  and  $3.6 \times 10^{14}$  photons/cm<sup>2</sup>, respectively.

Table ST2. Fitting parameters of TA kinetics traces in Figure S3.

| Sample                                                | Fluence<br>(photons/cm <sup>2</sup> ) | Fitting parameters |               |       |               |
|-------------------------------------------------------|---------------------------------------|--------------------|---------------|-------|---------------|
|                                                       |                                       | $A_1$              | $\tau_1$ (ns) | $A_2$ | $\tau_2$ (ns) |
| 80 °C annealed<br>PffBT4T-<br>2OD/PC <sub>71</sub> BM | $4.0 \times 10^{13}$                  | 0.13               | 2.2           | 0.13  | 51            |
|                                                       | $1.2 \times 10^{14}$                  | 0.10               | 1.8           | 0.11  | 42            |
|                                                       | $3.6 \times 10^{14}$                  | 0.08               | 1.6           | 0.09  | 25            |
